# Supplementary material for: The Structure of the RLIP76 RhoGAP-Ral Binding Domain Dyad: Fixed Position of the Domains Leads to Dual Engagement of Small G Proteins at the Membrane
Source: PubMed Central journal article supplement (PMC3852207; doi:10.1016/j.str.2013.09.007), 2013-12-03
Supplement: mmc1.pdf [file mmc1.pdf]

**Structure, Volume 21**

**Supplemental Information**

**The Structure of the RLIP76 RhoGAP-Ral Binding**

**Domain Dyad: Fixed Position of the Domains Leads to**

**Dual Engagement of Small G Proteins at the Membrane**

**Karthik V. Rajasekar, Louise J. Campbell, Daniel Nietlispach, Darerca Owen, and Helen R. Mott**

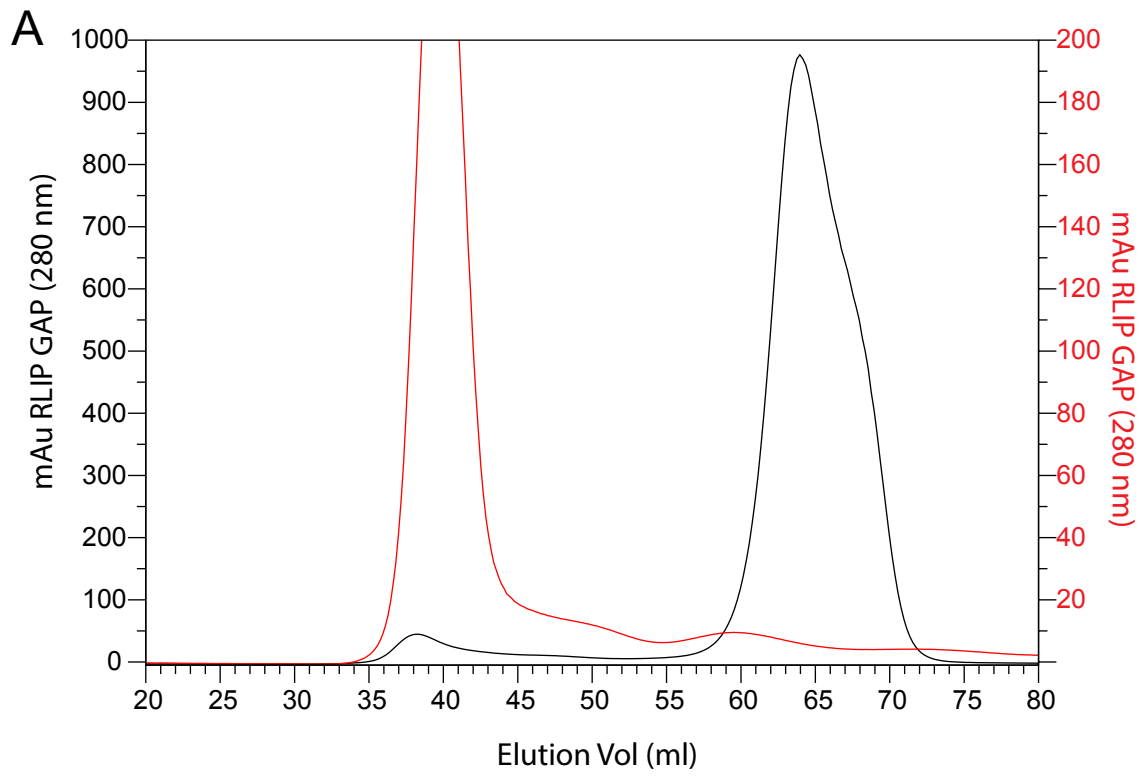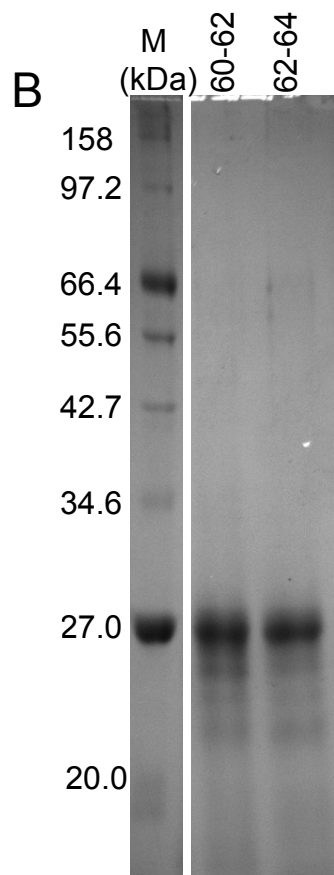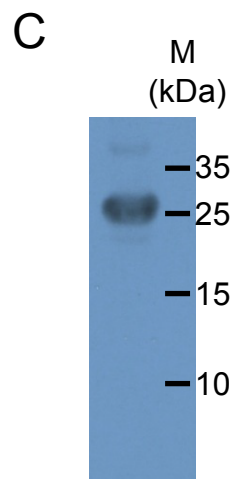

**D**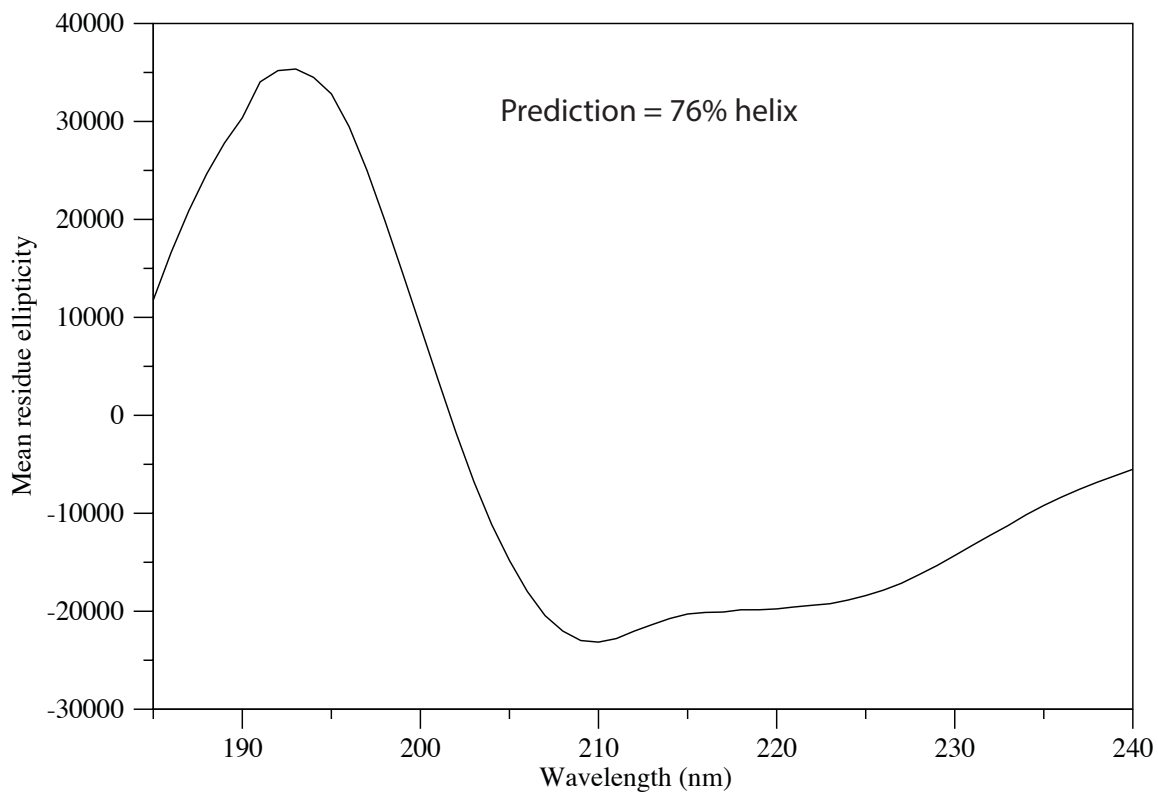**E**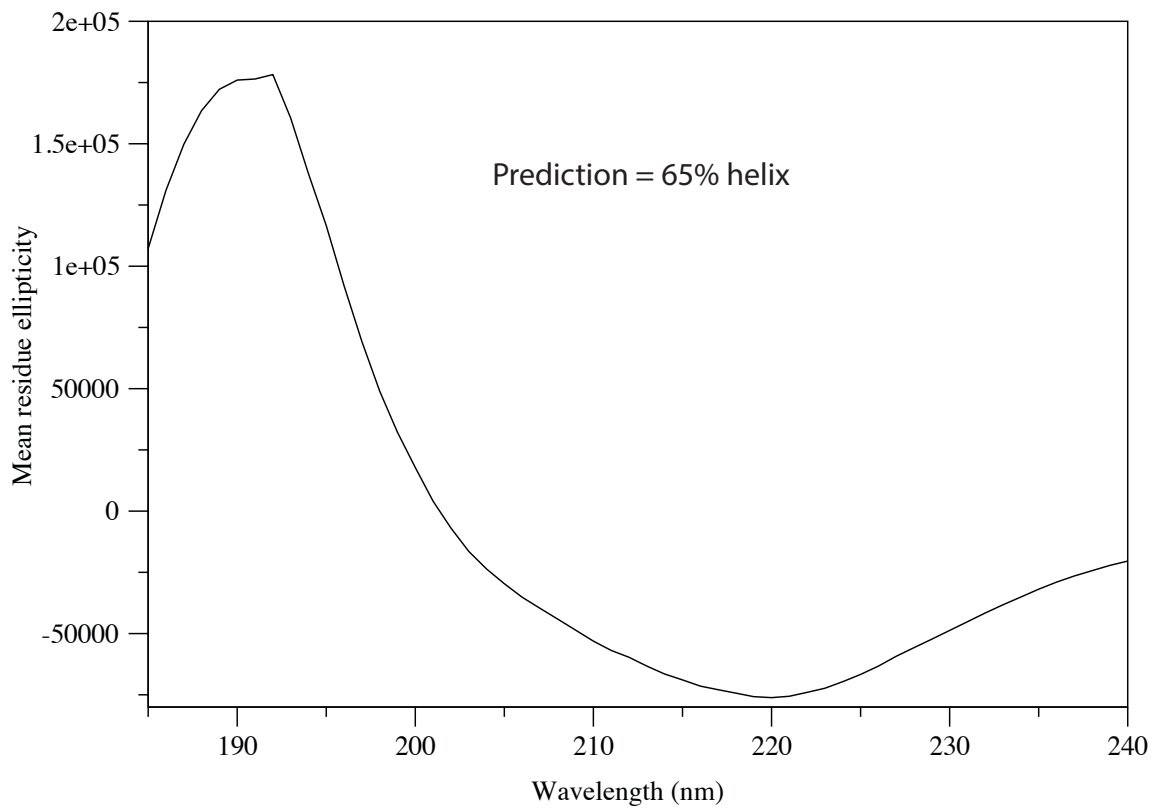

### Supplementary Methods.

CD experiments were recorded in 50 mM sodium phosphate pH 7.8, 100 mM sodium fluoride. Spectra were recorded on an AVIV 410 in a 0.1 cm path length quartz cuvette. Three wavelength scans were recorded for each sample between 260 and 185 nm. Secondary structure prediction was performed using DICHROWEB (Whitmore & Wallace, 2004; Whitmore & Wallace, 2008), using CDSSTR (Compton & Johnson, 1986; Sreerama & Woody, 2000) and reference set 3.

### Supplementary Figure S1

Purification of the RLIP GAP insert protein from inclusion bodies and CD analysis

- A. Gel filtration traces of RLIP76 GAP domain (black) and refolded RLIP76 GAP insert (red). The RLIP76 GAP insert is shown scaled up 5-fold (y-axis scale on the right) compared to the RLIP76 GAP domain (y-axis scale on the left).
- B. The individual 2 ml fractions were concentrated and ran on SDS-PAGE, followed by Coomassie staining. The two fractions that eluted between 60 and 64 ml contained a discrete band at 27 kDa and were pooled.
- C. A Western blot probed with anti-His (Santa Cruz SC803) shows that the 27 kDa band includes a His-tag.
- D. CD spectrum of RLIP76 GAP domain and the secondary structure prediction from the CD. The helicity predicted from our structure is 58%.
- E. CD spectrum of GAP insert mutant protein and the secondary structure prediction from the CD. The helicity predicted from our structure is 55% if it is assumed that the insert loop is unstructured.

### References.

Compton LA, Johnson WC (1986) Analysis of Protein Circular-Dichroism Spectra for Secondary Structure Using a Simple Matrix Multiplication. *Anal Biochem* **155**: 155-167

Sreerama N, Woody RW (2000) Analysis of protein CD spectra: Comparison of CONTIN, SELCON3, and CDSSTR methods in CDPro software. *Biophys J* **78**: 334A-334A

Whitmore L, Wallace BA (2004) DICHROWEB, an online server for protein secondary structure analyses from circular dichroism spectroscopic data. *Nucl Acid Res* **32**: W668-W673

Whitmore L, Wallace BA (2008) Protein secondary structure analyses from circular dichroism spectroscopy: Methods and reference databases. *Biopolymers* **89**: 392-400
